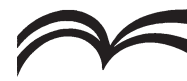

RESEARCH PAPER

# Apoplastic oxidation of L-asparagine is involved in the control of the green algal endophyte *Acrochaete operculata* Correa & Nielsen by the red seaweed *Chondrus crispus* Stackhouse

Florian Weinberger<sup>1,\*</sup>, Georg Pohnert<sup>2</sup>, Mary-Lynn Berndt<sup>1</sup>, Kamal Bouarab<sup>1</sup>, Bernard Kloareg<sup>1</sup> and Philippe Potin<sup>1</sup>

<sup>1</sup> UMR 7139 CNRS, Université Pierre et Marie Curie and Laboratoires Goëmar, Station Biologique, Place Georges Teissier, F-29680 Roscoff, France

<sup>2</sup> Max-Planck-Institut für Chemische Ökologie, Hans-Knöll-Str. 8, D-07745 Jena, Germany

Received 7 September 2004; Accepted 3 February 2005

## Abstract

Gametophytes of the marine alga *Chondrus crispus* are more resistant than tetrasporophytes to infection by the filamentous endophytic alga *Acrochaete operculata*. It has been shown recently that carrageenan oligosaccharides from the resistant gametophytic generation of *C. crispus* stimulate the secretion of L-asparagine (L-Asn) by the endophyte and that the host generates hydrogen peroxide and 2-oxo-succinamic acid after contact with this amino acid. Here the response of *C. crispus* to L-Asn and its effect on the pathogen is investigated. *Chondrus crispus* released hydrogen peroxide, ammonium ions, and a carbonyl compound into the medium when exposed to L-Asn. This response was correlated with an increase in oxygen consumption. Inhibitor studies indicated the involvement of a flavoenzyme in the reaction, which was sensitive to high concentrations of the reaction product, ammonium, and to chlorpromazine, quinacrine, and cyanide, inhibitors of L-amino acid oxidase. Cell wall macerate of *C. crispus* also responded to L-Asn, while protoplasts were inactive. Uptake of L-Asn into the cell was not necessary for the response, suggesting that the involved L-amino acid oxidase is apoplastic. *Acrochaete operculata* was more sensitive to hydrogen peroxide than *C. crispus* and settlement of *A. operculata* zoospores on *C. crispus* was reduced by 86% in the presence of L-Asn. This reduced settlement could be prevented with catalase.

*Chondrus crispus* thus features an apoplastic amino acid oxidase, which is involved in the control of its endophytic pathogen. The modulation of the amino acid secretion in *A. operculata* by carrageenan oligosaccharides is therefore a key issue in the etiology of the association.

Key words: *Acrochaete*, asparagine, *Chondrus*, endophytism, host–pathogen interactions, L-amino acid oxidase.

## Introduction

Release of activated oxygen species such as hydrogen peroxide (H<sub>2</sub>O<sub>2</sub>) is a ubiquitous characteristic of plant defence reactions. Active oxygen species may have direct cytotoxic effects on plant pathogens (Mellersh *et al.*, 2002). They also orchestrate a variety of secondary responses, including cell wall cross-linking and synthesis of pathogenesis-related proteins and phytoalexins (Lamb and Dixon, 1997; Wojtaszek, 1997; Bolwell, 1999; Mellersh *et al.*, 2002). In most plant–pathogen interactions, a diphenylene-iodonium (DPI)-sensitive (O'Donnell *et al.*, 1993), membrane-located, and receptor-activated NADPH-oxidase generates superoxide radicals (Levine *et al.*, 1994; Doke and Miura, 1995; Lamb and Dixon, 1997; Bolwell *et al.*, 1998), which eventually dismutate into H<sub>2</sub>O<sub>2</sub> and O<sub>2</sub> (Sutherland, 1991). Apoplastic peroxidases (Bolwell *et al.*, 1998; Martinez *et al.*, 1998), as well as various oxidases such

\* To whom correspondence should be addressed. Fax: +33 2 9829 2324. E-mail: weinberg@sb-roscoff.fr

as oxalate oxidase (Zhang *et al.*, 1995; Thordal-Christensen *et al.*, 1997) or amine oxidase (Laurenzi *et al.*, 2001; Rea *et al.*, 2002), have also been identified as sources of activated oxygen species in higher plants.

Elicitor- or stress-activated, DPI-sensitive oxidases, presumably membrane-bound NADPH oxidases, have been reported in *Chondrus crispus* (Bouarab *et al.*, 1999) and other red algae (Weinberger *et al.*, 1999), as well as in brown algae (Küpper *et al.*, 2001; Coelho *et al.*, 2002). The reactions catalysed by these enzymes were shown to control infections by pathogens, including bacteria (Weinberger and Friedlander, 2000; Küpper *et al.*, 2001) and endophytic filamentous algae (Bouarab *et al.*, 1999; Küpper *et al.*, 2002). However, and even though more evidence for induced defence reactions of algae upon pathogen recognition is emerging (for reviews, see Potin *et al.*, 2002; Steinberg and de Nys, 2002), the host–microbe interactions of most marine algae remain poorly understood.

The interaction between *C. crispus* and its endophytic green algal pathogen *Acrochaete operculata* provides an interesting system to decipher the biochemical bases of host immunity and pathogen virulence in marine algae. The tetrasporophytic and gametophytic life stages of *C. crispus* live in mixed populations in the same environment and are isomorphic, but differ in their susceptibility to *A. operculata*. In infection trials, tetrasporophytic thalli were successfully infected by approximately 10 times more pathogenic zoospores than gametophytes and the spore settlement was patchier on gametophytes than on tetrasporophytes (Correa and McLachlan, 1991; Bouarab *et al.*, 1999). After successful penetration of the outer cell wall, filaments of *A. operculata* developed faster in tetrasporophytic hosts and the penetration of the medulla was a rare exception in gametophytes, but was the rule in tetrasporophytes when host and pathogen were cultivated together for a period of 2 months (Correa *et al.*, 1988; Correa and McLachlan, 1991, 1992, 1994). Gametophytes of *C. crispus* are thus more resistant to *A. operculata* than tetrasporophytes, although no difference was detected in the number of individuals of both life stages of *C. crispus* that were associated with *A. operculata* in natural populations from the British Isles (Plumb, 1999).

The host cell wall matrix polysaccharides of *C. crispus*— $\kappa$ - and  $\lambda$ -type carrageenans, respectively, in gametophytes and tetrasporophytes—were shown to control endophyte penetration, with  $\lambda$ -carrageenans increasing and  $\kappa$ -carrageenans reducing the endophyte virulence (Bouarab *et al.*, 1999). Contact of *A. operculata* with  $\kappa$ -carrageenans induces enhanced secretion of the nitrogen storage compound L-asparagine (L-Asn), which in turn induces a release of  $H_2O_2$  by *C. crispus* (Weinberger *et al.*, 2002). Here a detailed characterization of the processes, which occur after contact of the host with L-Asn secreted by the

pathogen, is provided with focus on the enzymatic  $H_2O_2$  production and its role in the chemical defence of *C. crispus*. It is shown that L-Asn is the substrate of an apoplasmic L-amino acid oxidase in the host that generates  $H_2O_2$ . The  $H_2O_2$  concentrations generated by *C. crispus* in the presence of physiologically relevant amounts of L-Asn were sufficient to prevent settlement of *A. operculata* zoospores significantly, and it is argued that the host L-amino acid oxidase is involved in the control of the early stages of the infection by *A. operculata*.

## Materials and methods

### Plant material and cultivation methods

The material of *Chondrus crispus* Stackhouse used was either unialgal and clonal or non-unialgal and non-clonal (=‘wild type’). Reproductive wild-type material was collected at Pointe St-Barbe, Roscoff, France, separated into gametophytes and tetrasporophytes, and maintained in tanks of running sea water. Wild-type material from Spillanes Cove, New Brunswick (Canada) provided by T Chopin was also used and treated in the same way. Unialgal cultures of *Acrochaete operculata* Correa and Nielsen (isolate KH 04068-1-1 from Ketch Harbour, Nova Scotia, Canada) and of tetrasporophytic *C. crispus* (isolate JC 0001 PC-S from Peggy’s Cove, Nova Scotia, Canada) were provided by J Correa and grown in SFC medium prepared from sterile sea water as described previously (Bouarab *et al.*, 1999).

### Bioassays

During all experiments, *C. crispus* was incubated at a density of  $50\text{ g l}^{-1}$ . The cell wall of *C. crispus* was macerated and protoplasts were prepared according to Le Gall *et al.* (1990). The protoplasts were used at a density of  $4.24 \times 10^8\text{ ml}^{-1}$ . For infection trials, three freshly cut fragments of unialgal *C. crispus* were cultivated in 10 ml of SFC medium (Correa and McLachlan, 1991) and inoculated with  $4 \times 10^4\text{ ml}^{-1}$  zoospores from *A. operculata*. They were maintained in SFC medium with or without L-Asn ( $165\text{ }\mu\text{M}$ ) and with or without catalase ( $1100\text{ U ml}^{-1}$ ). The culture medium was changed after 24 h and from then on three times a day. After 5 d all spores that had settled on *C. crispus* were counted with a light microscope. The size of *C. crispus* surfaces was determined by image analysis of projections generated with a digital scanner, using the free UTHSC-SA ImageTool software (developed at the University of Texas Health Science Center at San Antonio, Texas and available from the internet at <ftp://maxrad6.uthscsa.edu>).

For determination of their sensitivity to  $H_2O_2$ , various concentrations of  $H_2O_2$  were added to the medium of *C. crispus* and *A. operculata*. The medium was discarded after 60 min and replaced with fresh medium containing 0.05% of the membrane-impermeable stain Evans blue. The staining solution was removed after 30 min and the algae were washed three times with fresh medium. Stained epidermal cells of *C. crispus* and stained cells of *A. operculata* were counted using a light microscope. In addition, stained biomass of *A. operculata* was suspended in a defined volume of sea water and the optical density at 680 nm was measured with a spectrophotometer.

For quantification of the bacterial flora associated with *C. crispus*, the algae were homogenized with an Ultra-Turrax in a defined volume of sterile sea water. The homogenate was then plated out on nutrient agar 2216 (Oppenheimer and ZoBell, 1952) and incubated for 2 weeks at  $15\text{ }^\circ\text{C}$  in darkness. The numbers of bacterial units that had formed colonies were then counted.

### Monitoring metabolization and uptake of amino acids

In these experiments, 250 mg FW of *C. crispus* were incubated on a shaker in Petri dishes containing 5 ml of autoclaved sea water. Amino acids were added from stock solutions in water. Unless otherwise indicated, all amino acids and other reagents used were from Sigma-Aldrich-Fluka (St Louis, MO, USA). Subsequent H<sub>2</sub>O<sub>2</sub> release was quantified using the luminol-assay as described in Bouarab *et al.* (1999). In addition to the treatments of *C. crispus* in medium (a), three different controls were examined in all experiments in order to allow for compensation of H<sub>2</sub>O<sub>2</sub> scavenging and H<sub>2</sub>O<sub>2</sub> release due to uncontrolled effects. These were (b) medium+ treatment, (c) medium+*C. crispus*, and (d) medium only. The netto-release of H<sub>2</sub>O<sub>2</sub> was then calculated according to the formula

$$[(a - b) - (c - d)] \times (\text{algal density})^{-1} = \text{release}$$

Carbonyl compounds (Soda, 1967) and ammonium (Koroleff, 1983) were analysed spectrophotometrically, using oxalacetic acid and NH<sub>4</sub>Cl as external standards, respectively; these experiments were controlled in the same way as described for H<sub>2</sub>O<sub>2</sub> measurements. In dose-response experiments, *C. crispus* was incubated for 45 min in the presence of L-Asn before H<sub>2</sub>O<sub>2</sub>, ammonium (NH<sub>4</sub><sup>+</sup>) or carbonyl compounds were quantified.

The ability of *C. crispus* to sequester H<sub>2</sub>O<sub>2</sub> was monitored by the addition of 20 μM H<sub>2</sub>O<sub>2</sub> to the medium and quantification of H<sub>2</sub>O<sub>2</sub> remaining after an incubation period of 15 min. Algal O<sub>2</sub> consumption was determined using a stirred temperature-controlled chamber with an integrated oxygen electrode (15 °C; Hansatech Instruments Ltd, King's Lynn, UK), as described earlier (Weinberger *et al.*, 1999).

For investigation of the uptake of L-Asn from sea water by *C. crispus*, L-Asn containing 0.0425% [<sup>14</sup>C]L-Asn was added to the water. The initial specific activity of the batch was 0.0935 mCi mmol<sup>-1</sup>. After 1 h of incubation *C. crispus* was rinsed five times for 5 s in 5 ml of fresh sterile sea water in order to remove attached L-Asn from the algal surface. The biomass was then solubilized with perchloric acid-H<sub>2</sub>O<sub>2</sub>, following Lobban (1974). Radioactivity in the solubilized biomass, as well as in sea water samples taken during incubation, was measured with a Tri-Carb 1500 counter (Packard, Rungis, France).

### Pharmacological analysis

Several compounds were screened for their potential activating or inhibiting activity on H<sub>2</sub>O<sub>2</sub> generation after exposure of *C. crispus* to 165 μM L-Asn. Ammonium chloride, potassium chloride (final concentration in the medium 100 mM), calcium chloride (100 mM), potassium cyanide, diethylpyrocarbonate (100 μM), and imidazole (20 mM) were added from stock solutions dissolved in H<sub>2</sub>O. Quinacrine, chlorpromazine, diphenylene-iodonium (100 μM), salicylhydroxamic acid (10 μM), anthracene-9-carboxylic acid (100 μM), 4-aminopyridine (1 mM), staurosporine (20 μM), 2,4-dinitrophenol (100 μM), and A23187 (50 μM) were added from stock solutions dissolved in dimethyl sulphoxide (DMSO). Kryptofix 222 was purchased from Merck (Darmstadt, Germany) and added from a stock solution in water. Valinomycin (5 μM) and verapamil (100 μM) from Calbiochem (France Biochem, Meudon, France) were added from stock solutions in water and DMSO, respectively.

## Results

### Metabolization of L-Asn by *C. crispus*

Not only H<sub>2</sub>O<sub>2</sub>, but also carbonyl compounds and NH<sub>4</sub><sup>+</sup> accumulated in the medium after exposure of *C. crispus* gametophytes to L-Asn (Fig. 1). H<sub>2</sub>O<sub>2</sub> concentrations

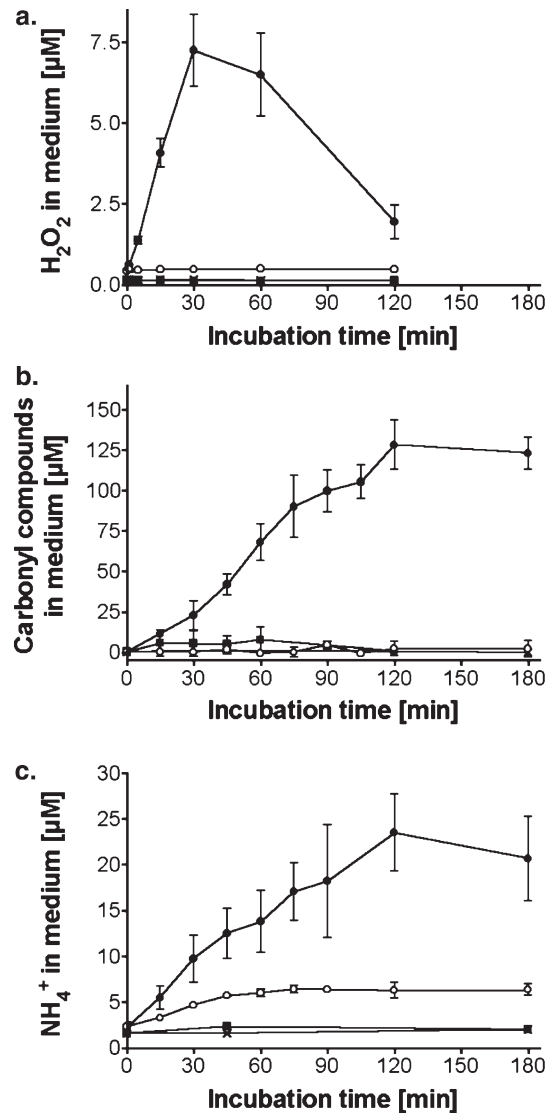

**Fig. 1.** Kinetics of the accumulation of H<sub>2</sub>O<sub>2</sub> (a), carbonyl compounds (b) and NH<sub>4</sub><sup>+</sup> (c) in the incubation medium of *C. crispus* wild-type gametophytes from France upon exposure to L-Asn. The parameters were quantified in sea water (crosses), in sea water with addition of 168 μM L-Asn (filled squares), in sea water with *C. crispus* (open circles), and in sea water with *C. crispus* and addition of L-Asn (filled circles). Bars indicate standard deviation; n=3.

exhibited a transient maximum after 45 min (Fig. 1A), while maximal carbonyl concentrations were reached after 2 h (Fig. 1B) and remained stable during the next 12 h. NH<sub>4</sub><sup>+</sup> concentrations (Fig. 1C) were generally lower than the carbonyl concentrations and, at 2 h after the addition of L-Asn, they started to decrease, down to below the detection limit at 24 h. Hydrogen peroxide concentrations were also markedly lower than the carbonyl concentrations.

Supply of fresh L-Asn resulted in an immediate generation of more H<sub>2</sub>O<sub>2</sub>, carbonyl compounds and NH<sub>4</sub><sup>+</sup>. By contrast, the production of these metabolites immediately stopped when *C. crispus* was transferred into L-Asn-free



medium (data not shown). During repeated cycles of exposure and non-exposure to L-Asn, the  $\text{H}_2\text{O}_2$  release was slightly reduced from the second cycle onwards (Fig. 2A), which was correlated with an increased capability of *C. crispus* to scavenge  $\text{H}_2\text{O}_2$  (Fig. 2B).

The necessary doses of L-Asn for induction of half-maximal  $\text{H}_2\text{O}_2$  release proved to be similar in *C. crispus* gametophytes and tetrasporophytes originating from both sides of the Atlantic (13.2–26.1  $\mu\text{M}$  L-Asn; Table 1) and the same was true for the maximal responses that were observed (Table 1). Similar Michaelis constants were also computed for  $\text{O}_2$  consumption and release of carbonyl compounds and  $\text{NH}_4^+$  in gametophytes (14.3–40.6  $\mu\text{M}$  L-Asn; Table 1), and tetrasporophytes showed comparable responses when they were exposed to equal concentrations of L-Asn (data not shown). Addition of L-Asn to cell wall macerate of *C. crispus* gametophytes, prepared with

cellulase and carrageenase, resulted within 45 min in a production of carbonyl compounds. Comparable treatment of *C. crispus* protoplasts—purified from the cell wall macerate and tested intact as well as after osmolysis in distilled water—did not cause such an effect (Fig. 3).

#### Uptake of L-Asn by *C. crispus*

As shown by uptake analysis of externally administered [ $^{14}\text{C}$ ]L-Asn, *C. crispus* gametophytes sequestered L-Asn from the medium for only 10 min after the addition of the amino acid (Fig. 4). The amount that was taken up was low in comparison to the amount of L-Asn that was broken down under identical conditions (Fig. 1B). Moreover, most L-Asn that had accumulated in *C. crispus* was released by five subsequent washings of 5 s in L-Asn-free sea water. During 1 h of incubation in 168  $\mu\text{M}$  L-Asn, only  $0.18 \pm 0.09 \text{ nmol g}^{-1} \text{ min}^{-1}$  were taken up by the algal biomass.

#### Specificity and pharmacological characterization of the metabolism of L-Asn

Neither *N*- $\alpha$ -acetyl-L-Asn nor succinamic acid induced significant responses in *C. crispus* gametophytes at concentrations up to 1 mM. Of the 24 amino acids that were tested, only L-phenylalanine (L-Phe), L-lysine (L-Lys), and L-methionine (L-Met) induced a significant release of  $\text{H}_2\text{O}_2$ , although not as strong as L-Asn (Fig. 5). These three amino acids also induced a release of carbonyl compounds and—with the exception of L-Met which interferes with the assay used—of  $\text{NH}_4^+$  (data not shown).

Potassium cyanide (target: metalloenzymes and amino acid oxidase), quinacrine (target: flavin-dependent redox enzymes, in particular, oxidases), and chlorpromazine (target: amino acid oxidase and various other enzymes) completely inhibited the oxidative response of *C. crispus* after exposure to L-Asn (Table 2). By contrast, the inhibitors of NADH- and NADPH-dependent enzymes, diphenylene-iodonium and imidazole, did not affect the oxidative burst response.

Ammonium chloride (Table 2), but not potassium chloride or calcium chloride, inhibited the response at millimolar concentrations, while Kryptofix 222, an  $\text{NH}_4^+$ -chelating agent, increased the response when it was added in the medium at concentrations above 100  $\mu\text{M}$ . Increases by 87% and 185% were observed after application of 1 mM and 6 mM Kryptofix 222, respectively. No inhibition was observed after application of the peroxidase-inhibitor salicylhydroxamic acid. Various compounds which are known to modify the permeability of the plasma membrane for protons (2,4-dinitrophenol),  $\text{K}^+$  (4-aminopyridine, valinomycin),  $\text{Ca}^{2+}$  (verapamil, A23187), anions (anthracene-9-carboxylic acid), or amino acids [(diethylpyrocarbonate (DEPC)], as well as the protein-kinase inhibitor staurosporine, also did not affect the  $\text{H}_2\text{O}_2$  release response of the

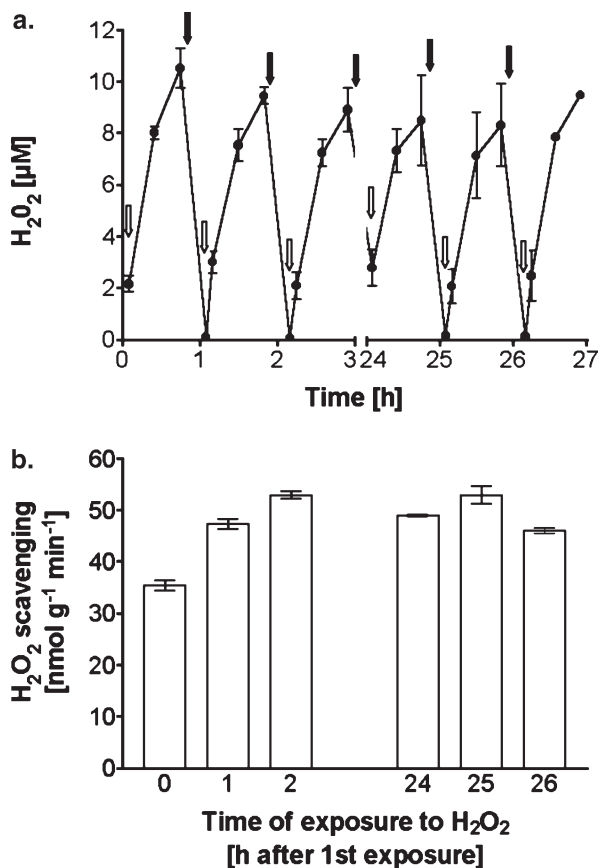

**Fig. 2.** (a) Development of  $\text{H}_2\text{O}_2$  concentrations in the incubation medium of *C. crispus* wild-type gametophytes from France during six cycles of addition and removal of L-Asn. Bars indicate the standard deviation;  $n=3$ . White arrows indicate addition of 168  $\mu\text{M}$  L-Asn to the medium; black arrows indicate replacement of the medium with fresh, asparagine-free medium. (b) Scavenging of  $\text{H}_2\text{O}_2$  by *C. crispus* wild-type gametophytes from France within 5 min of exposure to  $15.9 \pm 1.3 \mu\text{M}$   $\text{H}_2\text{O}_2$ . Bars indicate standard deviation;  $n=3$ . As in (a), the same algae were retested 1, 2, 24, 25, and 26 h after the first exposure.

**Table 1.** Kinetic constants of the responses of *C. crispus* to incubation with L-asparagine

| Response                                 | Material tested              | Maximal response <sup>a</sup> | $K_m$ <sup>b</sup> |
|------------------------------------------|------------------------------|-------------------------------|--------------------|
| Release of H <sub>2</sub> O <sub>2</sub> | Gametophyte wild-type France | 2.4 (2.2–2.7)                 | 13.2 <sup>c</sup>  |
|                                          | Sporophyte wild-type France  | 2.0 (1.7–2.4)                 | 17.8 (2.3–33.5)    |
|                                          | Gametophyte wild-type Canada | 2.2 (2.0–2.5)                 | 13.9 (5.3–22.5)    |
|                                          | Sporophyte wild-type Canada  | 2.4 (2.2–2.6)                 | 26.1 (16.5–35.8)   |
| O <sub>2</sub> consumption               | Gametophyte wild-type France | 15.3 (11.9–18.7)              | 14.3 (4.9–23.7)    |
| Release of carbonyl compounds            | Gametophyte wild-type France | 41.7 (35.1–48.3)              | 40.6 (11.5–69.7)   |
| Release of NH <sub>4</sub> <sup>+</sup>  | Gametophyte wild-type France | 20.0 (16.8–23.1)              | 27.7 (12.3–43.1)   |

<sup>a</sup> Maximal H<sub>2</sub>O<sub>2</sub> release response [nmol g<sup>-1</sup> min<sup>-1</sup>] and

<sup>b</sup> the necessary asparagine concentration [μM] for half-maximal response induction with L-asparagine are given. Brackets indicate 95% confidence intervals.

<sup>c</sup> Data taken from Weinberger *et al.* (2002).

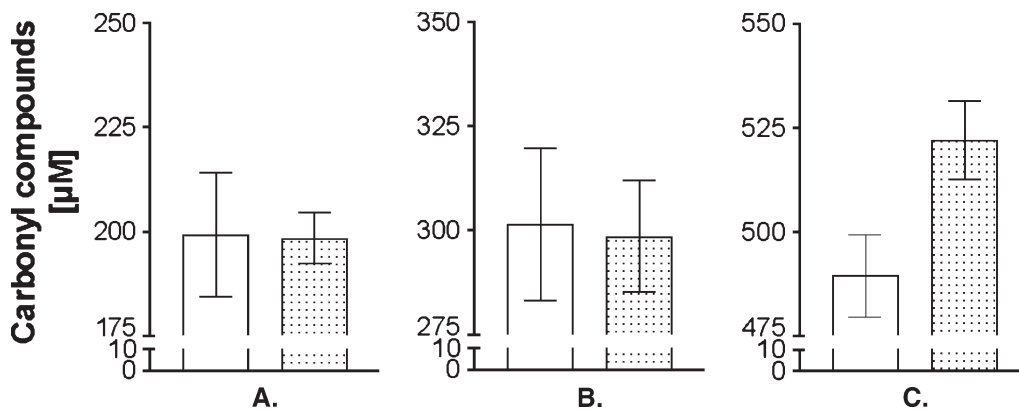

**Fig. 3.** Concentrations of carbonyl compounds in the medium of protoplasts prepared from *C. crispus* wild-type gametophytes from France before (A) and after (B) osmolytic treatment in distilled water and in *C. crispus* cell-wall macerate (C). The measurements were conducted 0 min (white columns) and 45 min (stippled columns) after addition of 168 μM L-Asn. Bars indicate standard deviation;  $n=3$ .

gametophytes following exposure to L-Asn (data not shown).

#### Accumulation of H<sub>2</sub>O<sub>2</sub> following exposure of *C. crispus* tetrasporophytes to L-Asn controls the algal epiflora

The survival of *C. crispus* tetrasporophytes and of *A. operculata* zoospores in the presence of H<sub>2</sub>O<sub>2</sub> was monitored by staining with Evans blue. As indicated by their capacity to exclude the dye, filaments of *A. operculata* proved to be more sensitive to H<sub>2</sub>O<sub>2</sub> than *C. crispus* tissue (Fig. 6). Some cells of the green algal endophyte were already affected at H<sub>2</sub>O<sub>2</sub>-concentrations of 100 μM, whereas *C. crispus* was unaffected by concentrations as high as 5 mM. About 1 mM of H<sub>2</sub>O<sub>2</sub> was necessary for a half-maximal damage of the endophyte tissue, a concentration approximately 20 times lower than the EC<sub>50</sub> for the red algal tissue (19.4 mM).

As indicated by the numbers of *A. operculata* zoospores that settled and developed within 1 week on the walls of Petri dishes following repeated exposure to 168 μM L-Asn (Table 3), the survival of the endophyte spores was not directly affected by the amino acid. By contrast, repeated exposure to L-Asn reduced by 86% the number of spores

that settled on *C. crispus* tetrasporophyte JC001PC-S. Suppression of zoospore settlement was prevented by the addition of catalase to the medium, together with L-Asn. Further, a single addition of 168 μM L-Asn to *C. crispus* wild-type gametophytes was sufficient to eliminate, within 30 min, 57% of the associated bacteria (from  $12.0 \pm 10^4$  to  $5.1 \pm 10^4$  colony forming units g<sup>-1</sup>;  $n=3$ ).

## Discussion

### *Chondrus crispus* features an apoplasmic L-amino acid oxidase specific for L-Asn

It is shown here that the red alga *C. crispus* readily breaks down L-Asn into H<sub>2</sub>O<sub>2</sub>, NH<sub>4</sub><sup>+</sup>, and a carbonyl compound (Fig. 1), a process which is accompanied by the consumption of oxygen (Table 1). In a previous report, LC-MS analyses showed that the carbonyl compound released by *C. crispus* after exposure to L-Asn is succinamic acid (Weinberger *et al.*, 2002).

The response of *C. crispus* to incubation in the presence of L-Asn was inhibited by relatively few pharmacological agents. Compounds like DPI (Bouarab *et al.*, 1999) or anthracene-9-carboxylic acid, A23187, and staurosporine (K Bouarab, unpublished observations) clearly affect the

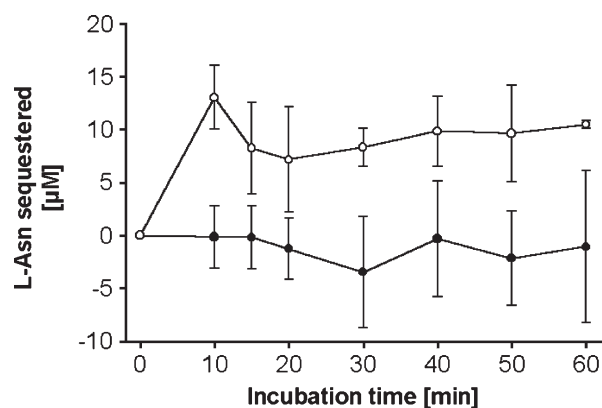

**Fig. 4.** Uptake of L-Asn from sea water in Petri dishes with (open circles) and without (filled circles) *C. crispus* wild-type gametophytes from France. The initial L-Asn concentration was 168  $\mu\text{M}$ . Bars indicate standard deviation;  $n=3$ .

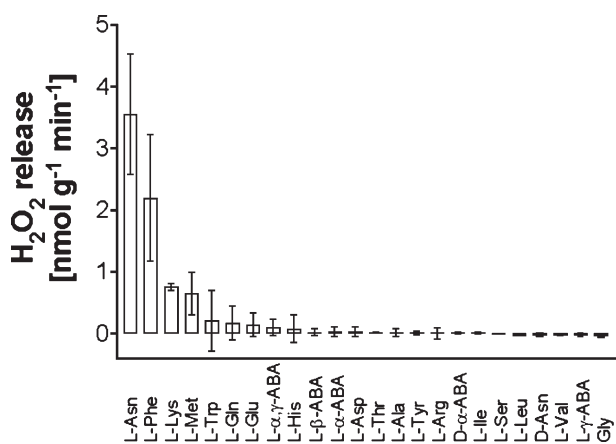

**Fig. 5.** Release of  $\text{H}_2\text{O}_2$  by *C. crispus* wild-type gametophytes from France after exposure to 168  $\mu\text{M}$  concentrations of various amino acids. ABA, Amino butyric acid. Bars indicate standard deviation;  $n=3$ .

oxidative burst in *C. crispus* thalli in response to defence elicitation. Nonetheless, they were without effect in the present study, which indicates that NADPH-oxidase and signalling pathways involving protein phosphorylation or  $\text{Ca}^{2+}$  translocation were probably not activated by L-Asn. Moreover, plant receptor stimulation usually results in a refractory state of several hours, during which no new response is possible (Navazio *et al.*, 2002). Such a refractory state was not observed in the present study; release of  $\text{H}_2\text{O}_2$  ceased when L-Asn was removed or used up and resumed again directly after application of fresh L-Asn (Fig. 2). L-Asn, therefore, probably does not act as a signal specific for a receptor in *C. crispus*. The strict dependence of  $\text{H}_2\text{O}_2$  release on the presence of L-Asn instead points to a role for L-Asn as a substrate for an enzyme.

The pharmacological agents that inhibited the response of *C. crispus* to L-Asn were quinacrine, chlorpromazine, and potassium cyanide (Table 2). All three are relatively unspecific, but are known to inhibit, among other enzymes, L-

**Table 2.** Inhibition constants for different agents that completely inhibit the oxidative burst response of *C. crispus* wild-type gametophytes from France to 168  $\mu\text{M}$  L-Asn

The necessary concentration for half-maximal inhibition is given. Brackets indicate 95% confidence intervals.

| Agent                  | $\text{EC}_{50}$               |
|------------------------|--------------------------------|
| Chlorpromazine         | 11.8 $\mu\text{M}$ (8.1–17.1)  |
| Quinacrine             | 43.4 $\mu\text{M}$ (29.3–64.3) |
| KCN                    | 601 $\mu\text{M}$ (305–1186)   |
| $\text{NH}_4\text{Cl}$ | 42.6 mM (27.0–67.0)            |

amino acid oxidase (Fujisawa *et al.*, 1982; Pistorius, 1983; Zollner, 1990; Vallon *et al.*, 1993). The presence of high concentrations of  $\text{NH}_4^+$  also inhibited the reaction (Table 2), while it was activated after trapping of  $\text{NH}_4^+$  with the chelating agent Kryptofix 222.

No response was observed with D-Asn (Weinberger *et al.*, 2002) and most proteinogenous amino acids (Fig. 5). N-modified derivatives of L-Asn were also not accepted as a substrate, indicating the involvement of a stereospecific reaction with an absolute requirement for the presence of a free amino group. Based on the release of  $\text{H}_2\text{O}_2$ , L-Phe, L-Lys, and L-Met were also metabolized by *C. crispus*, yet at much lower rates than L-Asn (Fig. 5).

Altogether, these observations indicate that *C. crispus* features an L-amino acid oxidase, which specifically metabolizes L-Asn as follows:

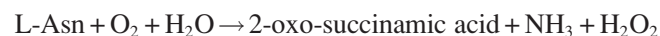

L-Amino acid oxidases (EC 1.4.3.2) are flavoenzymes which catalyse the oxidative transformation of L-amino acids to 2-imino-acids, which are subsequently hydrolysed into 2-keto-acids and ammonia. Two electrons are transferred from the amino acid to the flavin cofactor, which then reduces molecular oxygen to  $\text{H}_2\text{O}_2$  (Curti *et al.*, 1992). Consistent with this mechanism, the amounts of L-Asn necessary for the induction of half-maximal responses in oxygen consumption and the release of  $\text{H}_2\text{O}_2$ , carbonyl compounds, and  $\text{NH}_4^+$  were of the same order of magnitude (Table 2). That these compounds were not observed in 1:1 stoichiometric ratios (Fig. 1) is probably due to concomitant scavenging of  $\text{H}_2\text{O}_2$  (Fig. 2B) and uptake of  $\text{NH}_4^+$  by the red alga.

An L-Asn-dependent release of  $\text{H}_2\text{O}_2$ ,  $\text{NH}_4^+$ , and 2-oxo-succinamic acid could involve transport of L-Asn into the cell followed by an intracellular breakdown of the amino acid and release of the products (Palenik and Morel, 1990a). Transport proteins, however, were apparently not necessary for the oxidation of L-Asn by *C. crispus*, since the response proved to be fully insensitive to the ionophores 2,4-dinitrophenol and valinomycin, as well as to DEPC. In addition, uptake of labelled L-Asn from the incubation medium was very limited (Fig. 4) and the label was readily washed out from the algal biomass, showing

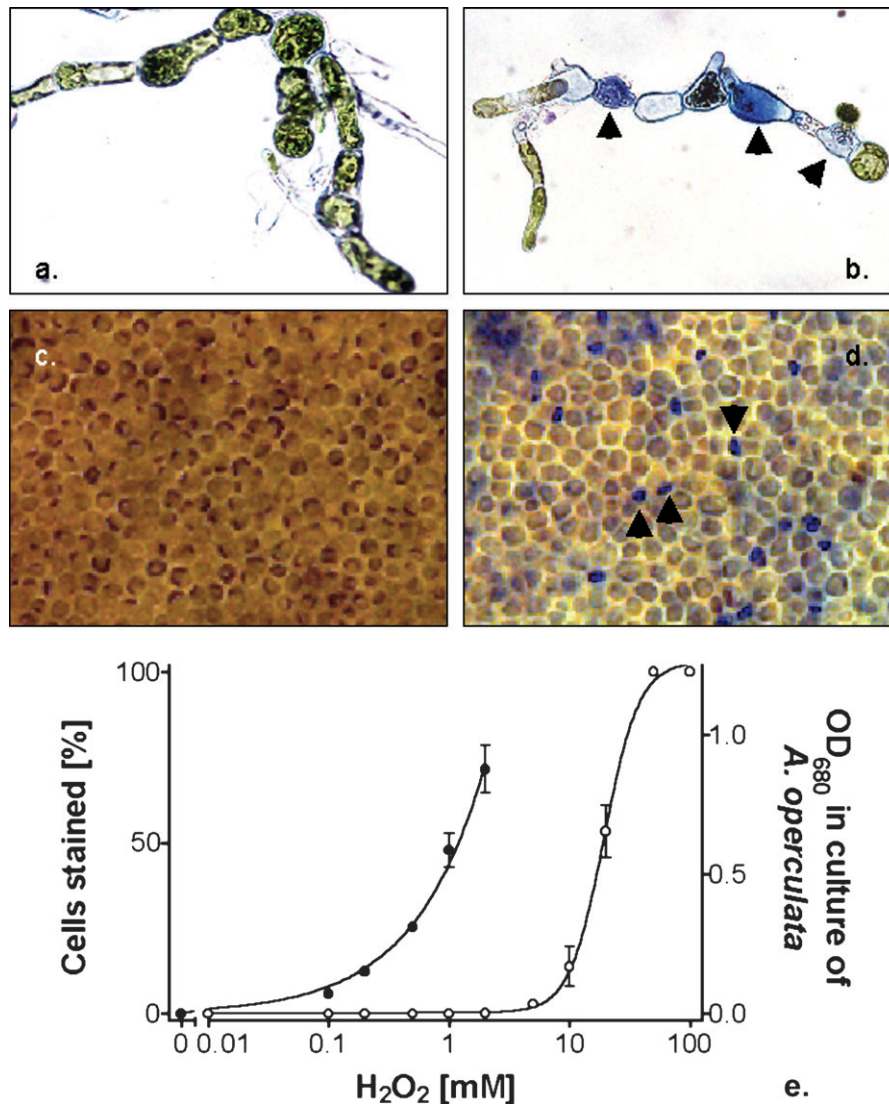

**Fig. 6.** Sensitivity of *A. operculata* and *C. crispus* wild-type gametophytes from France to  $H_2O_2$ . Cells of *A. operculata* (a, b) and *C. crispus* (c, d) after treatment without  $H_2O_2$  (a, c), with 1 mM  $H_2O_2$  (b) or with 10 mM  $H_2O_2$  (d) and subsequent staining with Evans blue. The diameters of *A. operculata* and *C. crispus* cells were approximately 15  $\mu$ M and 5  $\mu$ M, respectively. Arrows indicate some of the cells that were stained. (E) Dose–response curves of  $H_2O_2$  toxicity to *A. operculata* (filled circles, quantified as optical density at 680 nm) and *C. crispus* (open circles, quantified as relative amount of stained cells). Bars indicate standard deviation;  $n=3$ . Lines represent best fitting logistic functions.

that it was rather adsorbed in the algal free space than taken up. The L-amino acid oxidase is therefore probably an apoplastic enzyme. This is further supported by the fact that cell wall macerate of *C. crispus* generated carbonyl compounds from L-Asn. Intact protoplasts—devoid of the cell wall—were inactive, and osmolytic of these protoplasts resulted in a release of cytoplasmic carbonyl compounds, but not in additional production of such compounds from L-Asn (Fig. 3). Corresponding with these observations, protein extracts of *C. crispus* never expressed L-amino acid oxidase-like activity, while extraction pellets—presumably containing cell wall debris—generated carbonyl compounds from L-Asn (data not shown).

Among eukaryotic photosynthetic organisms, L-amino-acid oxidases have so far been reported from two red macroalgae, *Gymnogongrus flabelliformis* (Fujisawa *et al.*, 1982) and *Amphiroa crassissima* (Ito *et al.*, 1987), as well as from the unicellular algae *Chlamydomonas reinhardtii* (Muñoz-Blanco *et al.*, 1990; Piedras *et al.*, 1992; Vallon *et al.*, 1993), *Pleurochrysis* spp. (Palenik and Morel, 1990a), *Prymnesium* spp. (Palenik and Morel, 1990b), and *Amphidinium* spp. (Palenik and Morel, 1990b). The L-amino acid oxidase of *C. crispus* shows similarities with that of *C. reinhardtii*. Both enzymes are extracellular (Muñoz-Blanco *et al.*, 1990) and are inhibited by  $NH_4^+$  (Muñoz-Blanco *et al.*, 1990; Vallon *et al.*, 1993). By contrast, the L-amino acid oxidase



**Table 3.** Settlement of *A. operculata* zoospores on the tetrasporophytic *C. crispus* strain JC001PC-S and on polystyrene Petri dishes

The settlement was monitored 5 d after inoculation, with and without addition of 1100 U ml<sup>-1</sup> catalase and 168 µM L-Asn to the medium. + and – refer to presence and absence, respectively.

|                   | Catalase | L-Asn | Settled spores mm <sup>-1</sup> |
|-------------------|----------|-------|---------------------------------|
| Petri dish        | –        | –     | 41.0±9.9                        |
|                   | –        | +     | 41.6±20.1                       |
| <i>C. crispus</i> | –        | –     | 9.9±4.4                         |
|                   | –        | +     | 1.4±1.2                         |
|                   | +        | +     | 8.7±1.7                         |

of *G. flabelliformis* is intracellular and insensitive to NH<sub>4</sub><sup>+</sup> (Fujisawa *et al.*, 1982).

#### Biological significance of *C. crispus* L-amino acid oxidase

Release of nitrogen from amino acids has until now been regarded as the main ecophysiological role of L-amino acid oxidases in algae. The extracellular L-amino acid oxidases detected in planktonic organisms are induced under nitrogen-depleted conditions, metabolize a wide spectrum of free amino acids, and allow for growth with amino acids as the sole nitrogen source (Muñoz-Blanco *et al.*, 1990; Palenik and Morel, 1990a, b). *Chondrus crispus* would also be capable of using nitrogen from free amino acids for growth, since c. 50% of the NH<sub>4</sub><sup>+</sup> released from L-Asn was sequestered (Table 2). However, the total concentration of free amino acids in coastal sea water does not exceed 1 µM, and L-Asn, L-Phe, L-Lys, and L-Met together usually account for not more than 10% of this amount (Chau and Riley, 1966; Clark *et al.*, 1972; Jørgensen, 1982). Not more than 0.1 µM of free amino acids are therefore available in free sea water for oxidation by *C. crispus*. Nonetheless, oxidation of L-Asn by *C. crispus* was detected only at concentrations above 1 µM (Weinberger *et al.*, 2002), and the necessary concentrations for half-maximal activity were at least 10 times higher (Table 1). These kinetic constants are at least 100 times too high to allow for an efficient uptake of amino acid-bound nitrogen from sea water.

Up to 100 µM Asn are present in the medium of *A. operculata* cultures (50 g biomass l<sup>-1</sup>), and this concentration more than doubles when κ-carrageenan oligosaccharides are present in the culture medium and accelerate the excretion (Weinberger *et al.*, 2002). Further, *A. operculata* is endowed with the enzymatic equipment to degrade κ-carrageenans (Bouarab *et al.*, 1999). It is thus assumed that after the invasion of *C. crispus*, *A. operculata* filaments excrete L-Asn, a process further enhanced upon recognition of κ-oligocarrageenans, when the endophyte reaches the inner cortex of gametophytic hosts. It follows that L-Asn would accumulate in the host apoplast surrounding the pathogen, and local concentrations signifi-

cantly higher than 100 µM would result in the cortex. In this situation, *C. crispus* L-amino acid oxidase should enable the host to gain nitrogen from its attacker.

The build-up of L-Asn concentrations at the site of attack would also result in a steady release of H<sub>2</sub>O<sub>2</sub>, and the question arises are the concentrations reached sufficient to kill the pathogen. No local quantification of H<sub>2</sub>O<sub>2</sub> at the penetrating sites was possible, but indirect evidence is available indicating that sufficient concentrations of this active oxygen species are locally present; addition of L-Asn to a tetrasporophytic strain inoculated with *A. operculata* zoospores reduced the settlement of the endophyte by 86% (Table 3). This effect was prevented by simultaneous addition of catalase, an enzyme transforming H<sub>2</sub>O<sub>2</sub> into molecular oxygen and water, which indicates that oxidation of the amino acid is an essential part of the protective action of L-Asn.

Another indication for the build-up of elevated amounts of H<sub>2</sub>O<sub>2</sub> in the apoplast of *C. crispus* can be obtained by monitoring its bacterial flora. In the present study, exposure of *C. crispus* gametophytes to L-Asn resulted in the elimination of 57% of the bacterial flora within 30 min, suggesting that the oxidation of the amino acid locally leads to H<sub>2</sub>O<sub>2</sub> concentrations high enough to kill associated bacteria. Certain bacteria associated with seaweeds are relatively sensitive to H<sub>2</sub>O<sub>2</sub>. Concentrations in the range of 20–600 µM were sufficient for the elimination of 50% of the bacterial flora associated with *Gracilaria conferta* (Weinberger and Friedlander, 2000) or *Laminaria digitata* (Küpper *et al.*, 2001). *Acrochaete operculata* filaments proved to be comparatively sensitive to H<sub>2</sub>O<sub>2</sub> as the concentration that damaged half of the endophyte filament cells (c. 1 mM) was markedly lower than that required to affect half of *C. crispus* gametophytic cells (c. 20 mM) (Fig. 6). In the interaction between tomato and its fungal pathogen *Colletotrichum coccodes*, H<sub>2</sub>O<sub>2</sub> generated extracellularly by the host prevents penetration of the pathogen, either by its cytotoxicity or by its involvement with cell-wall cross-linking (Mellersh *et al.*, 2002). Similarly it is proposed that oxidation of L-Asn contributes to the resistance of *C. crispus* gametophytes against *A. operculata* by hindering zoospore settlement and containing filament growth within the host tissue.

Altogether nitrogen sequestration is probably not the primary role of the L-amino acid oxidase of *C. crispus*. This enzyme is more likely to be involved with the control of the infection by its endophyte. Another possible target of this mechanism could be members of the genus *Ulva*, a widely distributed epiphytic pest. These contain large amounts of free L-Asn (Kakinuma *et al.*, 2001) and are known to excrete amino acids (Jørgensen, 1982).

The present study further confirms the important role of host cell wall carrageenans for the interaction of *C. crispus* with *A. operculata*. Only host tetrasporophytes contain κ-carrageenan, which is required to activate the secretion of L-Asn by the pathogen, which in turn provides the substrate



for H<sub>2</sub>O<sub>2</sub> generation. In addition to L-amino acid oxidase, *C. crispus* probably has further means to control *A. operculata*. Cell-free extracts of *A. operculata* have been shown to elicit a DPI-sensitive oxidative burst response in *C. crispus* gametophytes, which results in a modification of protein expression patterns and of resistance to *A. operculata* (Bouarab *et al.*, 1999, 2004). Attempts to identify this signal in *A. operculata* cell-free extracts are currently under way in the authors' laboratory.

## Acknowledgements

FW was supported by a CNRS 'Poste Rouge' fellowship and PP was given a grant by the Programme National de Biodiversité 'Interaction Durable' 1999–2001. We are thankful to Juan Correa (Santiago, Chile) and Thierry Chopin (Saint John, New Brunswick, Canada), who kindly provided us with algae. We also thank Guy Levavasseur who shared his oxygen-measuring chamber with us. W. Boland is acknowledged for the support during the preparation of the manuscript.

## References

- Bolwell GP.** 1999. Role of active oxygen species and NO in plant defense response. *Current Opinion in Plant Biology* **2**, 287–294.
- Bolwell GP, Davies RD, Gerrish C, Auh C-K, Murphy TM.** 1998. Comparative biochemistry of the oxidative burst produced by rose and French bean cells reveals two distinct mechanisms. *Plant Physiology* **116**, 1379–1385.
- Bouarab K, Adas F, Gaquerel E, Kloareg B, Salain J-P, Potin P.** 2004. The innate immunity of a marine red alga involves oxylipins from both the eicosanoid and octadecanoid pathways. *Plant Physiology* **135**, 1838–1848.
- Bouarab K, Potin P, Correa J, Kloareg B.** 1999. Sulfated oligosaccharides mediate the interaction between a marine red alga and its green algal pathogenic endophyte. *The Plant Cell* **11**, 1635–1650.
- Chau YK, Riley JP.** 1966. The determination of amino-acids in sea water. *Deep-Sea Research* **13**, 1115–1124.
- Clark ME, Jackson GA, North WJ.** 1972. Dissolved free amino acids in Southern California coastal waters. *Limnology and Oceanography* **17**, 749–758.
- Coelho SM, Taylor AR, Ryan KP, Sousa-Pinto I, Brown MT, Brownlee C.** 2002. Spatiotemporal patterning of reactive oxygen production and Ca<sup>2+</sup> wave propagation in *Fucus* rhizoid cells. *The Plant Cell* **14**, 2369–2381.
- Correa JA, McLachlan JL.** 1991. Endophytic algae of *Chondrus crispus* (Rhodophyta). III. Host specificity. *Journal of Phycology* **27**, 448–459.
- Correa JA, McLachlan JL.** 1992. Endophytic algae of *Chondrus crispus* (Rhodophyta). IV. Detrimental effects on the host following infections by *Acrochaete operculata* and *A. heteroclada*. *Marine Ecology Progress Series* **81**, 73–87.
- Correa JA, McLachlan JL.** 1994. Endophytic algae of *Chondrus crispus* (Rhodophyta). V. Fine structure of the infection by *Acrochaete operculata*. *European Journal of Phycology* **29**, 33–47.
- Correa JA, Nielsen R, Grund DW.** 1988. Endophytic algae of *Chondrus crispus* Stackhouse. II. *Acrochaete heteroclada* sp. nov., *Acrochaete operculata* sp. nov., and *Phaeophila dendroides* (Crouan frat.) Batters (Chlorophyta). *Journal of Phycology* **24**, 528–539.
- Curti B, Ronchi S, Pilone Simonetta M.** 1992. D- and L-amino acid oxidases. In: Müller F, ed. *Chemistry and biochemistry of flavoenzymes*. Boca Raton, FL, USA: CRC Press, 69–94.
- Doke N, Miura Y.** 1995. *In vitro* activation of NADPH-dependent O<sub>2</sub>-generating system in a plasma membrane-rich fraction of potato tuber tissues by treatment with an elicitor from *Phytophthora infestans* or with digitonin. *Physiological and Molecular Plant Pathology* **46**, 17–28.
- Fujisawa S, Hori K, Miyazawa K, Ito K.** 1982. Occurrence of L-amino acid oxidase in the marine red alga *Gymnogongrus flabelliformis*. *Bulletin of the Japanese Society for Scientific Fisheries* **48**, 97–103.
- Ito K, Hori K, Miyazawa K.** 1987. Purification and some properties of L-amino acid oxidase from *Amphiroa crassissima* Yendo. *Hydrobiologia* **151/152**, 563–569.
- Jørgensen NOG.** 1982. Heterotrophic assimilation and occurrence of dissolved free amino acids in a shallow estuary. *Marine Ecology Progress Series* **8**, 145–159.
- Kakinuma M, Shibahara N, Ikeda H, Maegawa M, Amano H.** 2001. Thermal stress responses of a sterile mutant of *Ulva pertusa* (Chlorophyta). *Fisheries Science* **67**, 287–294.
- Koroleff E.** 1983. Determination of ammonia. In: Grasshoff K, Kremling K, Ehrhardt M, eds. *Methods of sea water analysis*, 2nd edn. Weinheim, Germany: Wiley-VCH, 150–157.
- Küpper FC, Kloareg B, Guern J, Potin P.** 2001. Oligoguluronates elicit an oxidative burst in brown algal kelp, *Laminaria digitata*. *Plant Physiology* **125**, 278–291.
- Küpper FC, Müller D, Peters A, Kloareg B, Potin P.** 2002. Oligoalginate recognition and oxidative burst play a key role in natural and induced resistance of the sporophytes of Laminariales. *Journal of Chemical Ecology* **28**, 2037–2061.
- Lamb C, Dixon RA.** 1997. The oxidative burst in plant disease resistance. *Annual Reviews in Plant Physiology and Plant Molecular Biology* **48**, 251–275.
- Laurenzi M, Tipping AJ, Marcus SE, Knox JP, Federico R, Angelini R, McPherson MJ.** 2001. Analysis of the distribution of copper amine oxidase in cell walls of legume seedlings. *Planta* **214**, 37–45.
- Le Gall Y, Braud JP, Kloareg B.** 1990. Protoplast production in *Chondrus crispus* gametophytes (Gigartinales, Rhodophyta). *Plant Cell Reports* **8**, 582–585.
- Levine A, Tenhaken R, Dixon R, Lamb C.** 1994. H<sub>2</sub>O<sub>2</sub> from the oxidative burst orchestrates the plant hypersensitive disease resistance response. *Cell* **79**, 583–593.
- Lobban CS.** 1974. A simple, rapid method of solubilizing algal tissue for scintillation counting. *Limnology and Oceanography* **19**, 356–366.
- Martinez C, Montillet JL, Bresson E, Agnel JP, Dai GH, Daniel JF, Geiger JP, Nicole M.** 1998. Apoplastic peroxidase generates superoxide anions in cells of cotton cotyledons undergoing the hypersensitive reaction to *Xanthomonas campestris* pv. *Malveacearum* race 18. *Molecular Plant–Microbe Interactions* **11**, 1038–1047.
- Mellersh DG, Foulds IV, Higgins VJ, Heath MC.** 2002. H<sub>2</sub>O<sub>2</sub> plays different roles in determining penetration failure in three diverse plant-fungal interactions. *The Plant Journal* **29**, 257–268.
- Muñoz-Blanco J, Hidalgo-Martínez J, Cárdenas J.** 1990. Extracellular deamination of L-amino acids by *Chlamydomonas reinhardtii* cells. *Planta* **182**, 194–198.
- Navazio L, Moscattello R, Bellincampi D, Baldan B, Meggio F, Brini M, Bowler C, Mariani P.** 2002. The role of calcium in oligogalacturonide-activated signalling in soybean cells. *Planta* **215**, 596–605.

- O'Donnell VB, Tew DG, Jones OTG, England PJ.** 1993. Studies on the inhibitory mechanism of iodonium compounds with special reference to neutrophil NADPH oxidase. *Biochemistry Journal* **290**, 41–49.
- Oppenheimer CH, ZoBell CE.** 1952. The growth and viability of sixty-three species of marine bacteria as influenced by hydrostatic pressure. *Journal of Marine Research* **11**, 10–13.
- Palenik B, Morel FMM.** 1990a. Amino acid utilization by marine phytoplankton: a novel mechanism. *Limnology and Oceanography* **35**, 260–269.
- Palenik B, Morel FMM.** 1990b. Comparison of cell-surface L-amino acid oxidases from several marine phytoplankton. *Marine Ecology Progress Series* **59**, 195–201.
- Piedras P, Pineda M, Muñoz J, Cárdenas J.** 1992. Purification and characterization of an L-amino-acid oxidase from *Chlamydomonas reinhardtii*. *Planta* **188**, 13–18.
- Pistorius EK.** 1983. Effects of  $Mn^{2+}$ ,  $Ca^{2+}$  and chlorpromazine on photosystem II of *Anacystis nidulans* – an attempt to establish a functional relationship of amino acid oxidase to photosystem II. *European Journal of Biochemistry* **135**, 217–222.
- Plumb J.** 1999. Population dynamics and endophytic flora of *Chondrus crispus* (Rhodophyta): a temporal study. PhD thesis, University of the West of England, Bristol, UK.
- Potin P, Bouarab K, Salaün J-P, Pohnert G, Kloareg B.** 2002. Biotic interactions of marine algae. *Current Opinion in Plant Biology* **5**, 1–10.
- Rea G, Metoui O, Infantino A, Federico R, Angelini R.** 2002. Copper amine oxidase expression in defense responses to wounding and *Ascochyta rabiei* invasion. *Plant Physiology* **128**, 865–875.
- Soda K.** 1967. A spectrophotometric microdetermination of keto acids with 3-methyl-2-benzothiazolinone hydrazone. *Agriculture Biology Chemistry* **31**, 1054–1060.
- Steinberg PD, DeNys R.** 2002. Chemical mediation of colonization of seaweed surfaces. *Journal of Phycology* **38**, 621–629.
- Sutherland MW.** 1991. The generation of oxygen radicals during host plant responses to infection. *Physiological and Molecular Plant Pathology* **39**, 79–93.
- Thordal-Christensen H, Zhang Z, Wei Y, Collinge DB.** 1997. Subcellular localization of  $H_2O_2$ :  $H_2O_2$  accumulation in papillae and hypersensitive response during the barley–powdery mildew interaction. *The Plant Journal* **11**, 1187–1194.
- Vallon O, Bulté L, Kuras J, Wollman F-A.** 1993. Extensive accumulation of an extracellular L-amino-acid oxidase during gametogenesis of *Chlamydomonas reinhardtii*. *European Journal of Biochemistry* **215**, 351–360.
- Weinberger F, Friedlander M.** 2000. Response of *Gracilaria conferta* to oligogars results in defense against agar-degrading epiphytes. *Journal of Phycology* **36**, 1079–1086.
- Weinberger F, Friedlander M, Hoppe H-G.** 1999. Oligogars elicit a physiological response in *Gracilaria conferta* (Rhodophyta). *Journal of Phycology* **35**, 747–755.
- Weinberger F, Pohnert G, Kloareg B, Potin P.** 2002. A signal released by an endophytic attacker acts as a substrate for a rapid defensive reaction of the red alga *Chondrus crispus*. *ChemBioChem* **3**, 1260–1263.
- Wojtaszek P.** 1997. Oxidative burst: an early plant response to pathogen infection. *Biochemistry Journal* **322**, 681–692.
- Zhang Z, Collinge DB, Thordal-Christensen H.** 1995. Germin-like oxalate oxidase, a  $H_2O_2$ -producing enzyme, accumulates in barley attacked by the powdery mildew fungus. *The Plant Journal* **8**, 139–145.
- Zollner K.** 1990. *Handbook of enzyme inhibitors*. Weinheim, Germany: VCH Verlagsgesellschaft.
